# Supplementary material for: Structural changes in nanoporous solids due to fluid adsorption: thermodynamic analysis and Monte Carlo simulations
Source: Royal Society of Chemistry journal article supplement (doi:10.1039/b805117h), 2008-01-01
Supplement: b805117h.pdf [file b805117h.pdf]

## Structural changes in nanoporous solids due to fluid adsorption: thermodynamic analysis and Monte Carlo simulations.

### Electronic supplementary information

Marie Jeffroy<sup>a</sup>, Alain H. Fuchs<sup>b</sup> and Anne Boutin<sup>\*a</sup>

<sup>a</sup> Laboratoire de Chimie Physique, CNRS and Univ. Paris Sud, F-91405 Orsay, France. Fax: 33 16915 6188; Tel: 33 16915 4202; E-mail: [anne.boutin@lcp.u-psud.fr](mailto:anne.boutin@lcp.u-psud.fr)

<sup>b</sup> Ecole nationale supérieure de chimie de Paris (Chimie ParisTech) and Univ. Pierre et Marie Curie, 75005 Paris, France

### Dispersion-repulsion interactions :

All the dispersion-repulsion interactions were modelled with a Lennard-Jones potential:

$$U_{ij} = 4\epsilon_{ij} \left[ \left( \frac{\sigma_{ij}}{r} \right)^{12} - \left( \frac{\sigma_{ij}}{r} \right)^6 \right]$$

The parameters are given in table S1.

|                      | $\sigma$ (Å) | $\epsilon$ (K) |
|----------------------|--------------|----------------|
| Cl-Cl                | 3.50         | 193.8          |
| C-C                  | 3.35         | 64.0           |
| H-H                  | 2.64         | 12.0           |
| Cl-O <sub>host</sub> | 3.275        | 107.8          |
| C-O <sub>host</sub>  | 3.175        | 64.0           |
| H-O <sub>host</sub>  | 2.82         | 30.43          |

**Table S1:** Forcefield parameters for LJ potential

All the non given parameters can be obtain by using the Lorentz-Berthelot mixing rules (arithmetic rule for  $\sigma$  and geometric rule for  $\epsilon$ ). No dispersion terms were taken into account with silicon atoms (Kiselev approximation).

### Charges parameters :

Electrostatic charges of the framework were set to -0.7e for the oxygen and 1.4e for the silicon atom.

Adsorbate charges parameters are given in figure S1.

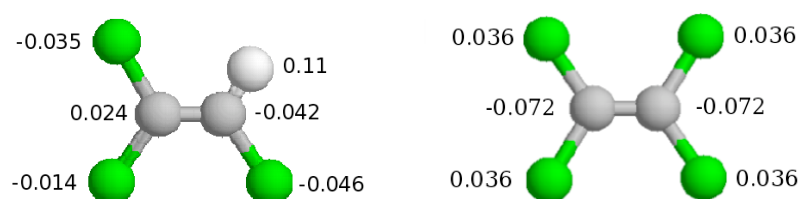

**Fig S1 :** Atomic charges (in electron units) used for Trichloroethene and Tetrachloroethene in Monte-Carlo simulations.
